# Supplementary material
Source: Springer Nature journal article supplement (https://www.springermedizin.de/resource/supplementary/13643_2012_58_MOESM1_ESM.pdf/9681322)
Supplement: MOESM1 [file 9681322]

(a)

Outcome: cases of influenza  
Random effects model - DerSimonian and Laird

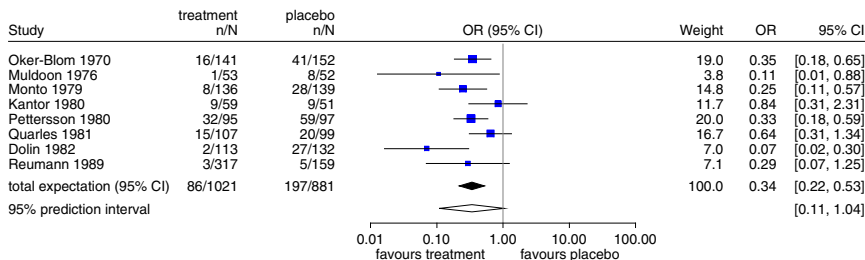

Heterogeneity:  $Q=12.44$ ,  $df=7$ ,  $p=0.087$ ,  $I^2=43.7\%$   
Overall effect:  $Z\text{ Score}=-4.84$ ,  $p<0.001$ ,  $\text{Tau}=0.400$

(b)

Outcome: cases of influenza  
Random effects model - DerSimonian and Laird

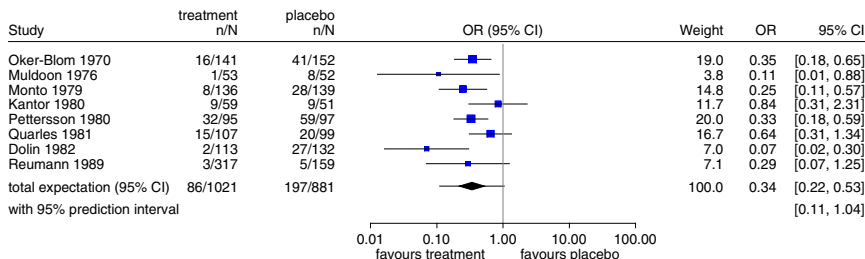

Heterogeneity:  $Q=12.44$ ,  $df=7$ ,  $p=0.087$ ,  $I^2=43.7\%$   
Overall effect:  $Z\text{ Score}=-4.84$ ,  $p<0.001$ ,  $\text{Tau}=0.400$

(c)

Outcome: cases of influenza  
Random effects model - DerSimonian and Laird

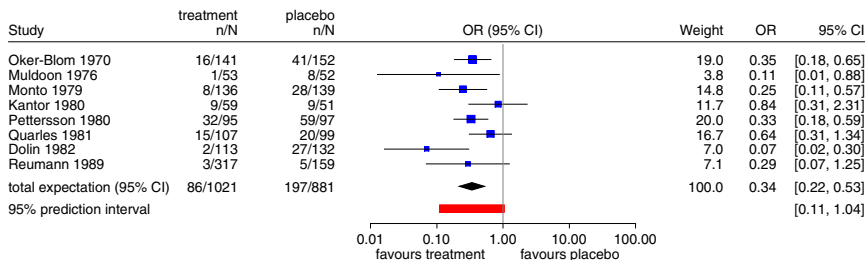

Heterogeneity:  $Q=12.44$ ,  $df=7$ ,  $p=0.087$ ,  $I^2=43.7\%$   
Overall effect:  $Z\text{ Score}=-4.84$ ,  $p<0.001$ ,  $\text{Tau}=0.400$
